# Supplementary material for: Cross-Cultural Adaptation, Translation, and Validation of the Toronto Extremity Salvage Score for Extremity Bone and Soft Tissue Tumor Patients in Netherlands
Source: PubMed Central journal article supplement (PMC5541809; doi:10.1155/2017/6197525), 2017-07-20
Supplement: 6197525.f1.pdf [file 6197525.f1.pdf]

## TORONTO EXTREMITY SALVAGE SCORE (TESS) – BOVENSTE EXTREMITTEIT

De volgende vragen gaan over de moeite die u heeft met het uitvoeren van veel voorkomende activiteiten in het dagelijks leven. Bedenk bij elke vraag hoeveel moeite u heeft gehad met de beschreven activiteit door de klacht van uw arm gedurende **de afgelopen week**.

|    |                                                        | Onmogelijk | Heel erg moeilijk | Moeilijk | Een beetje moeilijk | Geen enkel probleem | Niet op mij van toepassing |
|----|--------------------------------------------------------|------------|-------------------|----------|---------------------|---------------------|----------------------------|
| 1  | Een broek aantrekken is                                | 1          | 2                 | 3        | 4                   | 5                   | 6                          |
| 2  | Veters strikken is                                     | 1          | 2                 | 3        | 4                   | 5                   | 6                          |
| 3  | Sokken of kousen aantrekken is                         | 1          | 2                 | 3        | 4                   | 5                   | 6                          |
| 4  | Douchen is                                             | 1          | 2                 | 3        | 4                   | 5                   | 6                          |
| 5  | Een trui of jas aantrekken is                          | 1          | 2                 | 3        | 4                   | 5                   | 6                          |
| 6  | Een overhemd of blouse dichtknopen is                  | 1          | 2                 | 3        | 4                   | 5                   | 6                          |
| 7  | Een stropdas strikken of sjaal knopen is               | 1          | 2                 | 3        | 4                   | 5                   | 6                          |
| 8  | Mijzelf opmaken of scheren is                          | 1          | 2                 | 3        | 4                   | 5                   | 6                          |
| 9  | Tandenpoetsen is                                       | 1          | 2                 | 3        | 4                   | 5                   | 6                          |
| 10 | Mijn haar kammen is                                    | 1          | 2                 | 3        | 4                   | 5                   | 6                          |
| 11 | Licht huishoudelijk werk doen is                       | 1          | 2                 | 3        | 4                   | 5                   | 6                          |
| 12 | Tuinieren of in de tuin werken is                      | 1          | 2                 | 3        | 4                   | 5                   | 6                          |
| 13 | Maaltijden klaarmaken en opdienen is                   | 1          | 2                 | 3        | 4                   | 5                   | 6                          |
| 14 | Eten snijden tijdens de maaltijd is:                   | 1          | 2                 | 3        | 4                   | 5                   | 6                          |
| 15 | Uit een glas drinken is                                | 1          | 2                 | 3        | 4                   | 5                   | 6                          |
| 16 | Zwaar huishoudelijk werk is                            | 1          | 2                 | 3        | 4                   | 5                   | 6                          |
| 17 | Winkelen is                                            | 1          | 2                 | 3        | 4                   | 5                   | 6                          |
| 18 | Wisselgeld (munten of briefgeld) geven of ontvangen is | 1          | 2                 | 3        | 4                   | 5                   | 6                          |
| 19 | Dragen van een boodschappentas of koffertje is         | 1          | 2                 | 3        | 4                   | 5                   | 6                          |
| 20 | Een doos op een plank boven het hoofd zetten is        | 1          | 2                 | 3        | 4                   | 5                   | 6                          |

|    |                                                                | Onmogelijk | Heel erg moeilijk | Moeilijk | Een beetje moeilijk | Geen enkel probleem | Niet op mij van toepassing |
|----|----------------------------------------------------------------|------------|-------------------|----------|---------------------|---------------------|----------------------------|
| 21 | Een sleutel in een slot omdraaien is                           | 1          | 2                 | 3        | 4                   | 5                   | 6                          |
| 22 | Een deur open duwen of trekken is                              | 1          | 2                 | 3        | 4                   | 5                   | 6                          |
| 23 | Schrijven is                                                   | 1          | 2                 | 3        | 4                   | 5                   | 6                          |
| 24 | Kleine voorwerpen oppakken is                                  | 1          | 2                 | 3        | 4                   | 5                   | 6                          |
| 25 | Uitvoeren van mijn gebruikelijke taken op het werk of thuis is | 1          | 2                 | 3        | 4                   | 5                   | 6                          |
| 26 | Mijn gebruikelijke aantal uren werken op het werk of thuis is  | 1          | 2                 | 3        | 4                   | 5                   | 6                          |
| 27 | Beoefenen van mijn gebruikelijke vrijetijds bestedingen is     | 1          | 2                 | 3        | 4                   | 5                   | 6                          |
| 28 | Vrienden of familie bezoeken of op bezoek krijgen is           | 1          | 2                 | 3        | 4                   | 5                   | 6                          |
| 29 | Mijn gebruikelijke sport- of beweegactiviteiten uitvoeren is   | 1          | 2                 | 3        | 4                   | 5                   | 6                          |

|   |                                                                                                                                                             | Onmogelijk | Heel erg moeilijk | Moeilijk | Een beetje moeilijk | Geen enkel probleem | Niet op mij van toepassing |
|---|-------------------------------------------------------------------------------------------------------------------------------------------------------------|------------|-------------------|----------|---------------------|---------------------|----------------------------|
| 1 | Alle activiteiten in mijn dagelijks leven in acht genomen, zou ik de moeite om deze activiteiten gedurende de afgelopen week uit te voeren omschrijven als: | 1          | 2                 | 3        | 4                   | 5                   | 6                          |

|   |                                 | Volledig beperkt | Ernstig beperkt | Matig beperkt | Enigzins beperkt | Geheel niet beperkt |
|---|---------------------------------|------------------|-----------------|---------------|------------------|---------------------|
| 2 | Ik zou mijzelf beschrijven als: | 1                | 2               | 3             | 4                | 5                   |

Gebruik onderstaande ruimte om voor u belangrijke activiteiten waarmee u moeite heeft door de klachten van uw arm, die niet in deze vragenlijst aan de orde zijn geweest, te noteren.

---



---



---



---



---

## TORONTO EXTREMITY SALVAGE SCORE (TESS) – ONDERSTE EXTREMITTEIT

De volgende vragen gaan over de moeite die u heeft met het uitvoeren van veel voorkomende activiteiten in het dagelijks leven. Bedenk bij elke vraag hoeveel moeite u heeft gehad met de beschreven activiteit door de klacht van uw been gedurende **de afgelopen week**.

|    |                                                                                | Onmogelijk | Heel erg moeilijk | Moeilijk | Een beetje moeilijk | Geen enkel probleem | Niet op mij van toepassing |
|----|--------------------------------------------------------------------------------|------------|-------------------|----------|---------------------|---------------------|----------------------------|
| 1  | Een broek aantrekken is                                                        | 1          | 2                 | 3        | 4                   | 5                   | 6                          |
| 2  | Schoenen aandoen is                                                            | 1          | 2                 | 3        | 4                   | 5                   | 6                          |
| 3  | Sokken of kousen aantrekken is                                                 | 1          | 2                 | 3        | 4                   | 5                   | 6                          |
| 4  | Douchen is                                                                     | 1          | 2                 | 3        | 4                   | 5                   | 6                          |
| 5  | Licht huishoudelijk werk (zoals opruimen en stoffen) verrichten is             | 1          | 2                 | 3        | 4                   | 5                   | 6                          |
| 6  | Tuinieren of werken in de tuin is                                              | 1          | 2                 | 3        | 4                   | 5                   | 6                          |
| 7  | Maaltijden klaarmaken en opdienen is                                           | 1          | 2                 | 3        | 4                   | 5                   | 6                          |
| 8  | Winkelen is                                                                    | 1          | 2                 | 3        | 4                   | 5                   | 6                          |
| 9  | Zwaar huishoudelijk werk (zoals stofzuigen en verplaatsen van meubels) doen is | 1          | 2                 | 3        | 4                   | 5                   | 6                          |
| 10 | In en uit bad stappen is                                                       | 1          | 2                 | 3        | 4                   | 5                   | 6                          |
| 11 | Uit bed komen is                                                               | 1          | 2                 | 3        | 4                   | 5                   | 6                          |
| 12 | Opstaan uit een stoel is                                                       | 1          | 2                 | 3        | 4                   | 5                   | 6                          |
| 13 | Knielen is                                                                     | 1          | 2                 | 3        | 4                   | 5                   | 6                          |
| 14 | Bukken om iets van de vloer op te pakken is                                    | 1          | 2                 | 3        | 4                   | 5                   | 6                          |
| 15 | De trap oplopen is                                                             | 1          | 2                 | 3        | 4                   | 5                   | 6                          |
| 16 | De trap aflopen                                                                | 1          | 2                 | 3        | 4                   | 5                   | 6                          |
| 17 | Autorijden is                                                                  | 1          | 2                 | 3        | 4                   | 5                   | 6                          |
| 18 | Binnenshuis lopen is                                                           | 1          | 2                 | 3        | 4                   | 5                   | 6                          |
| 19 | Buitenshuis lopen is                                                           | 1          | 2                 | 3        | 4                   | 5                   | 6                          |
| 20 | Zitten is                                                                      | 1          | 2                 | 3        | 4                   | 5                   | 6                          |

|    |                                                                | Onmogelijk | Heel erg moeilijk | Moeilijk | Een beetje moeilijk | Geen enkel probleem | Niet op mij van toepassing |
|----|----------------------------------------------------------------|------------|-------------------|----------|---------------------|---------------------|----------------------------|
| 21 | Heuvels of een (lichte) helling op of aflopen is               | 1          | 2                 | 3        | 4                   | 5                   | 6                          |
| 22 | Rechtop staan is                                               | 1          | 2                 | 3        | 4                   | 5                   | 6                          |
| 23 | Opstaan vanuit knielen of hurken is                            | 1          | 2                 | 3        | 4                   | 5                   | 6                          |
| 24 | In- en uit de auto stappen is                                  | 1          | 2                 | 3        | 4                   | 5                   | 6                          |
| 25 | Seksuele activiteiten zijn                                     | 1          | 2                 | 3        | 4                   | 5                   | 6                          |
| 26 | Uitvoeren van mijn gebruikelijke taken op het werk of thuis is | 1          | 2                 | 3        | 4                   | 5                   | 6                          |
| 27 | Mijn gebruikelijke aantal uren werken op het werk of thuis is  | 1          | 2                 | 3        | 4                   | 5                   | 6                          |
| 28 | Beoefenen van mijn gebruikelijke vrijetijds bestedingen is     | 1          | 2                 | 3        | 4                   | 5                   | 6                          |
| 29 | Vrienden of familie bezoeken of op bezoek krijgen is           | 1          | 2                 | 3        | 4                   | 5                   | 6                          |
| 30 | Mijn gebruikelijke sport- of beweegactiviteiten uitvoeren is   | 1          | 2                 | 3        | 4                   | 5                   | 6                          |

|   |                                                                                                                                                             | Onmogelijk | Heel erg moeilijk | Moeilijk | Een beetje moeilijk | Geen enkel probleem | Niet op mij van toepassing |
|---|-------------------------------------------------------------------------------------------------------------------------------------------------------------|------------|-------------------|----------|---------------------|---------------------|----------------------------|
| 1 | Alle activiteiten in mijn dagelijks leven in acht genomen, zou ik de moeite om deze activiteiten gedurende de afgelopen week uit te voeren omschrijven als: | 1          | 2                 | 3        | 4                   | 5                   | 6                          |

|   |                                 | Volledig beperkt | Ernstig beperkt | Matig beperkt | Enigzins beperkt | Geheel niet beperkt |
|---|---------------------------------|------------------|-----------------|---------------|------------------|---------------------|
| 2 | Ik zou mijzelf beschrijven als: | 1                | 2               | 3             | 4                | 5                   |

Gebruik onderstaande ruimte om voor u belangrijke activiteiten waarmee u moeite heeft door de klachten van uw been, die niet in deze vragenlijst aan de orde zijn geweest, te noteren.

---



---



---
